# Supplementary material for: A Study of the Effects of Exercise on the Urinary Metabolome Using Normalisation to Individual Metabolic Output
Source: PubMed Central journal article supplement (PMC4381293; doi:10.3390/metabo5010119), 2015-02-27
Supplement: metabolites-05-00119-s001.pdf [file metabolites-05-00119-s001.pdf]

# Supplementary Materials

## MzMatch Processing Settings with Script

```
library(rJava)
library(mzmatch.R)
mzmatch.init()

setwd()
mzXMLfiles <- dir(full.names=TRUE,pattern="\\.mzXML$",recursive=TRUE)
outputfiles <- paste(sub(".mzXML","",mzXMLfiles),".peakml",sep="")

xset <- xcmsSet(mzXMLfiles, method='centWave', ppm=2, peakwidth=c(5,100),          snthresh=3,
prefilter=c(3,1000), integrate=1, mzdiff=0.001, verbose.columns=TRUE,
fitgauss=FALSE, nSlaves=16)

## Afterwards you split resulting xset by filenames and process it with peakml file writer.

xsets <- split (xset,xset@filepaths)

peakMLparallel <- function(x)
{
  library(mzmatch.R)
  mzmatch.init ()
  xset <- xsets[[x]]
  PeakML.xcms.write.SingleMeasurement
  (xset=xset,filename=outputfiles[x],ionisation="detect",addscans=20,writeRejected=FALSE,Apod
  isationFilter=TRUE)
}

if (length(xsets)==length(mzXMLfiles))
{

## Create a snow cluster for writing peakml files
cl <- makeCluster (8, type="SOCK")
clusterExport (cl,list=c("xsets","outputfiles"))
system.time(clusterApply(cl,1:length(outputfiles),peakMLparallel))
stopCluster(cl)
} else
{
cat ("xcms set does not contains peaks for all mzXML samples.")
}

MainClasses <- dir ()
dir.create ("combined_RSD_filtered")
dir.create ("combined_RSD_rejected")
dir.create ("combined")
for (i in 1:length(MainClasses)) {FILESf <- dir
(MainClasses[i],full.names=TRUE,pattern="\\.peakml$",recursive=TRUE)
OUTPUTf <- paste ("combined/",MainClasses[i],".peakml",sep="")
if(length(FILESf)>0){mzmatch.ipeak.Combine
(i=paste(FILESf,collapse=""),v=T,rtwindow=30,o=OUTPUTf,combination="set",ppm=5,label=paste
(MainClasses[i],sep=""))
RSDf <- paste ("combined_RSD_filtered/",MainClasses[i],".peakml",sep="")
REJf <- paste ("combined_RSD_rejected/",MainClasses[i],".peakml",sep="")
if(length(FILESf)>1)
mzmatch.ipeak.filter.RSDFilter(i=OUTPUTf,o=RSDf,rejected=REJf,rsd=1,v=T)
else
file.copy(OUTPUTf,RSDf)}
INPUTDIR <- "combined_RSD_filtered"
FILESf <- dir (INPUTDIR,full.names=TRUE,pattern="\\.peakml$")
mzmatch.ipeak.Combine(i=paste(FILESf,collapse=""),v=T,rtwindow=30,
o="combined.peakml",combination="set",ppm=5)
mzmatch.ipeak.filter.NoiseFilter
(i="combined.peakml",o="combined_noisef.peakml",v=T,codadw=0.8)
mzmatch.ipeak.filter.SimpleFilter(i="combined_noisef.peakml", o="combined_sfdet.peakml",
mindetections=3, v=T)
```

```

mzmatch.ipeak.filter.SimpleFilter(i="combined_sfdet.peakml",
o="combined_highintensity.peakml", minintensity=1000, v=T)
PeakML.GapFiller(filename = "combined_highintensity.peakml", ionisation = "detect", Rawpath
= NULL, outputfile = "highintensity_gapfilled.peakml", ppm = 0, rtwin = 0)
mzmatch.ipeak.sort.RelatedPeaks (JHeapSize=5000, i="highintensity_gapfilled.peakml", v=T,
o="mzMatch_output.peakml", basepeaks="mzMatch_basepeaks.peakml", ppm=5, rtwindow=6)
annot <- paste("relation.id,relation.ship,codadw,charge")
mzmatch.ipeak.convert.ConvertToText (JHeapSize=5000, i="mzMatch_output.peakml",
o="mzMATCHoutput.txt",v=T,annotations=annot)

# Processing finished! Now extracting chromatogram images for each peak.
chromdir <- "chromatograms"
dir.create(chromdir)
PeakMLData <- PeakML.Read("mzMatch_output.peakml",Rawpath=NULL)
peakIDlist <- c(1:length(unique(PeakMLData$peakDataMtx[,10])))
samplenames <- PeakMLData$sampleNames
sampleslist<-c(1:max(PeakMLData$peakDataMtx[,9]))
groupsets <- max(PeakMLData$peakDataMtx[,11])
if (groupsets!=1) {samplegroups <- PeakMLData$phenoData} else {samplegroups <- samplenames}
classnumbers <- samplegroups
for (i in 1:length(unique(samplegroups))){classnumbers <- sub(unique(classnumbers)[i], i,
classnumbers)}
for (a in 1:length(peakIDlist)){peakID <- peakIDlist[a]
hits <- which(PeakMLData$peakDataMtx[,10]==peakID)
intslist <- vector ("list")
rtlist <- vector ("list")
for (i in 1:length(hits)){intslist[[i]] <- PeakMLData$chromDataList[[hits[i]]][2,]
rtlist[[i]] <- (PeakMLData$chromDataList[[hits[i]]][3,]) / 60 }
maxint <- max(unlist(intslist))
minrt <- min (unlist(rtlist))
maxrt <- max (unlist(rtlist))
samplenumbers <- PeakMLData$peakDataMtx[hits,9]
myfilename <- paste(getwd(),"/",chromdir,"/",peakID,".png",sep="")
png(myfilename, width = 350, height = 300)
lw = 0.2
par(fig=c(0,1-lw,0,1))
plot (1,1,xlab="RT (m)", ylab="Intensity", pch="", xlim=c(minrt,maxrt), ylim=c(0,maxint))
for (i in 1:length(hits)){if (PeakMLData$peakDataMtx[hits[i],9] %in% sampleslist==TRUE){
points (rtlist[[i]], intslist[[i]], type="l", col=classnumbers[samplenumbers [i]])}
par(fig=c(0,1,0,1))
lpos <- par("usr")[2]-(lw / (1-lw ))*(par("usr")[2]-par("usr")[1])
legend (lpos, par("usr")[4], text.col=unique(classnumbers[sampleslist]),
unique(samplegroups[sampleslist]), cex=0.8,xpd=TRUE)
dev.off()}

## Rename file based on folder name
RENAME<-paste(basename(getwd()),".txt",sep="")
file.rename("mzMATCHoutput.txt",RENAME)

## Rename file based on folder name
RENAME<-paste(basename(getwd()),".peakml",sep="")
file.rename("mzMatch_output.peakml",RENAME)

### folder renaming
OLDNAME<-getwd()
RENAME<-paste(getwd(),"-done",sep="")
setwd()
file.rename(OLDNAME,RENAME)

```

**Table S1.** Ideom settings.

| Category           | Parameter                                       | Input    |
|--------------------|-------------------------------------------------|----------|
| XCMS (Centwave)    | Method (file type)                              | mzXML    |
|                    | Ppm                                             | 2        |
|                    | Peak width (min)                                | 5 s      |
|                    | Peak width (max)                                | 100 s    |
|                    | S/N * threshold                                 | 3        |
|                    | Pre-filter (No. of points)                      | 3        |
|                    | Pre-filter (intensity)                          | 1000     |
|                    | <i>m/z</i> difference                           | 0.001    |
| MzMatch            | MzMatch grouping RT ~ window                    | 0.5 min  |
|                    | MzMatch grouping <i>m/z</i> ppm                 | 5 ppm    |
|                    | Relative SD (RSD) filter                        | 0.80 #   |
|                    | Noise filter (CODA-DW ‡)                        | 0.80     |
|                    | Intensity filter (LOQ <sup>α</sup> )            | 1000     |
|                    | Minimum detections #                            | 3        |
|                    | RT window for related peaks                     | 0.10 min |
| Ideom              | RT for id of authentic standards                | 5.0%     |
|                    | RT for id for calculated RT                     | 50.0%    |
|                    | Ppm for mass identification                     | 3.0 ppm  |
|                    | Ignore related peaks before RT                  | 0.0 min  |
|                    | RT window for complex adducts                   | 0.50 min |
|                    | RT window for duplicate peaks                   | 1.00 min |
|                    | RT window for shoulder peaks                    | 2.0 min  |
|                    | Intensity ratio for shoulder peaks              | 5 to 1   |
|                    | Intensity limit duplicate peaks                 | 1%       |
|                    | <i>r</i> <sup>2</sup> limit for duplicate peaks | 0.99     |
| Preferred database | HumanDB (has <sup>β</sup> )                     |          |

Input details for settings in Ideom version 19 excel file. \* Signal to noise; ~ retention time; # generous; ‡ Durbin–Watson criterion; <sup>α</sup> limit of quantification; <sup>β</sup> Homo sapiens.

© 2015 by the authors; licensee MDPI, Basel, Switzerland. This article is an open access article distributed under the terms and conditions of the Creative Commons Attribution license (<http://creativecommons.org/licenses/by/4.0/>).
